## Horizontal transfer and subsequent explosive expansion of a DNA transposon in sea kraits

(*Laticauda*)

James D. Galbraith<sup>1</sup>, Alastair J. Ludington<sup>1</sup>, Kate L. Sanders<sup>1</sup>, Alexander Suh<sup>\*2,3</sup>, David L. Adelson<sup>\*1</sup>

1) School of Biological Sciences, University of Adelaide, Adelaide, SA 5005, Australia

5 2) School of Biological Sciences, University of East Anglia, Norwich Research Park, NR4 7TU, Norwich, United Kingdom

3) Department of Organismal Biology - Systematic Biology, Evolutionary Biology Centre, Uppsala University, SE-752 36 Uppsala, Sweden

10 \* Joint corresponding authors, equally contributed to the paper.

**Email:** david.adelson@adelaide.edu.au

James: <https://orcid.org/0000-0002-1871-2108>

Alastair: <https://orcid.org/0000-0003-3994-6023>

15 Alexander: <https://orcid.org/0000-0002-8979-9992>

Kate: <https://orcid.org/0000-0002-9581-268X>

David: <https://orcid.org/0000-0003-2404-5636>

### Classification

Biological Sciences: Evolution

20 **Keywords**

horizontal transfer, transposable element, Serpentes

### Author Contributions

25 J.D.G., A.S and D.L.A. designed research; D.L.A. and A.S supervised research; K.L.S. and A.L. provided olive sea snake genome assembly; J.D.G. performed research; and J.D.G., K.L.S. and D.L.A. wrote the paper with input from A.L. and A.S.

Article type: Research Articles

## Abstract

Transposable elements (TEs) are self replicating genetic sequences and are often described as important “drivers of evolution”. This driving force is because TEs promote genomic novelty by enabling rearrangement, and through exaptation as coding and regulatory elements. However, most TE insertions will be neutral or harmful, therefore host genomes have evolved machinery to suppress TE expansion. Through horizontal transposon transfer (HTT) TEs can colonise new genomes, and since new hosts may not be able to shut them down, these TEs may proliferate rapidly. Here we describe HTT of the *Harbinger-Snek* DNA transposon into sea kraits (*Laticauda*), and its subsequent explosive expansion within *Laticauda* genomes. This HTT occurred following the divergence of *Laticauda* from terrestrial Australian elapids ~15-25 Mya. This has resulted in numerous insertions into introns and regulatory regions, with some insertions into exons which appear to have altered UTRs or added sequence to coding exons. *Harbinger-Snek* has rapidly expanded to make up 8-12% of *Laticauda* spp. genomes; this is the fastest known expansion of TEs in amniotes following HTT. Genomic changes caused by this rapid expansion may have contributed to adaptation to the amphibious-marine habitat.

## Introduction

Transposable elements (TE) are selfish genetic elements that mobilize themselves across the genome. A substantial proportion of eukaryotic genomes is composed of TEs, with most reptilian and mammalian genomes comprising between 30 and 60%. As TEs proliferate within a genome, most insertions will be either neutral or deleterious [1]. However, over evolutionary timescales the movement of TEs can enable major adaptive change; being exapted as coding and regulatory sequences, and by promoting both inter- and intra-chromosomal rearrangements such as segmental duplications, inversions and deletions through non-allelic homologous recombination [2,3].

TE expansion can also be harmful, driving eukaryotes to evolve various defence and regulatory mechanisms. Genomic shocks can disrupt this regulation, allowing TEs to expand [4]. One example of a shock is horizontal transposon transfer (HTT), in which a TE jumps from one species to another. While the exact mechanisms of HTT are unknown, many instances across eukaryotes

have been reported [5–9]. Following HTT the expansion of new TEs is quickly slowed or halted due to the potentially deleterious effects they can cause [1,10], and any continued expansion will likely be slow. For example, following ancient HTT events the BovB retrotransposon has taken 32-39 My and 79-94 My for these elements to colonise between 6 and 18% of ruminant and Afrotheria  
65 genomes, respectively [6,11,12]. However rapid expansion of TEs following HT has previously been noted in *Myotis* bats, where *hAT* transposons expanded to cover 3.3% of the genome over the space of 15 Mya [13–15].

Here we report the HT of a *Harbinger* DNA transposon, *Harbinger-Snek*, into *Laticauda*, a genus of marine snakes which diverged from terrestrial Australian snakes 15-25 Mya [16–18]. Surprisingly,  
70 none of the available terrestrial animal genomes contained any trace of *Harbinger-Snek*, with highly similar sequences instead identified in sea urchins. Since diverging from terrestrial snakes *Laticauda* transitioned to amphibious-marine habits, foraging on coral reefs and returning to land only to digest prey, mate and lay eggs [19]. Due to the absence of *Harbinger-Snek*-like sequences from terrestrial species and highly similar sequences present in marine species, we propose  
75 *Harbinger-Snek* was horizontally transferred to *Laticauda* from a marine donor genome by habitat transition. Furthermore, since this initial HTT event, *Harbinger-Snek* has expanded rapidly within the genomes of *Laticauda* and now accounts for 8% of the *L. laticaudata* assembly and 12% of the *L. colubrina* assembly.

## 80 **Methods**

All scripts/code used at: [https://github.com/jamesdgalbraith/Laticauda\\_HT](https://github.com/jamesdgalbraith/Laticauda_HT)

### ***Ab initio* repeat annotation of elapids**

Using RepeatModeler2 [20] we performed *ab initio* annotation of the four Austro-Melanesian elapid genomes: *Laticauda colubrina* [21], *Notechis scutatus*, *Pseudonaja textilis*, and *Aipysurus laevis*  
85 [22]. To improve the RepeatModeler2 libraries we manually classified consensus sequences over 200 bp using a BLAST, extend, align and trim method, described by Galbraith et al. [23].

### **Identification of horizontal transfer and potential source/vectors**

To identify any TEs restricted to a single lineage of elapid, we searched for all TEs identified by

90 RepeatModeler2 using BLASTN (-task dc-megablast) [24] in the three other assemblies, as well  
assemblies of the Asian elapids *Naja naja* [25] and *Ophiophagus hannah* [26]. TEs present in high  
numbers in a species, but not present in the other elapids, were considered potential HTT. This  
yielded a high copy number of *Harbinger* elements in *L. colubrina*. To rule out contamination, we  
searched for this element in a *L. laticaudata* genome assembly from GenBank. Using RPSBLAST  
95 [27] and the Pfam database [28] we identified *Harbinger* copies with intact protein-coding domains.  
To identify potential source or vector species, we searched all metazoan RefSeq genomes with a  
contig N50 of at least 10 kbp with BLASTN (-penalty -5 -reward 4 -out -word\_size 11 -gapopen 12 -  
gapextend 8) . In species containing similar elements, we created consensus sequences using the  
aforementioned BLAST, extend, align and trim method. As we had identified similar *Harbinger*  
100 elements in fish, bivalves and echinoderms from RefSeq, we repeated this process for all GenBank  
assemblies of other species from these clades with a contig N50 of at least 10 kbp.

We identified transposase domains present in curated *Harbinger* sequences and all autonomous  
*Harbinger* elements available from Repbase [29] using RPSBLAST [27] and the Pfam database  
[28] . Using MAFFT (--localpair) [30] we created a protein multiple sequence alignment (MSA) of  
105 identified transposase domains. After trimming the MSA with Gblocks [31] we constructed a  
phylogenetic tree using FastTree [32] and from this tree chose an appropriate outgroup to use with  
curated elements. We subsequently constructed a protein MSA of the curated transposases using  
MAFFT, trimmed the MSA with Gblocks and created a phylogeny using IQ-TREE 2 (-m MFP -B  
1000), which selected TVMe+I+G4 as the best model [33–35]. For comparison we also created  
110 phylogenies using the same MSA with MrBayes and RAxML [36,37]. To compare the repeat and  
species phylogenies, we created a species tree of major sampled animal taxa using TimeTree [38].

### **Potential interaction of *Harbinger-Snek* with genes**

Using the improved RepeatModeler2 libraries and the Repbase (-lepidosaur) library, we used  
115 RepeatMasker [39] to annotate the two species of *Laticauda*. Using Liftoff [40] we transferred the  
*No. scutatus* gene annotation from RefSeq [41] to the *L. colubrina* and *L. laticaudata* genome  
assemblies. To identify *Harbingers* in genes, exons and regulatory regions we intersected the  
RepeatMasker intervals and transferred gene intervals using plyranges [42]. To test for potential

effects of these insertions on biological processes and molecular functions in *Laticauda* we ran  
120 PANTHER overrepresentation tests [43] of each using *Anolis carolinensis* as reference with genes  
annotated in *Laticauda* as a filter.

### Continued expression of *Harbinger-Snek*

To test if *Harbinger-Snek* is expressed in *L. laticaudata* we aligned raw RNA-seq reads from four  
125 tissues to the *L. laticaudata* genome from Kishida et al. [21] (BioProject PRJDB7257) using STAR  
[44] and examined the location of intact *Harbinger-Snek* TEs in IGV [45] and exons in which we had  
identified *Harbinger* insertions.

## Results and discussion

### 130 *Harbinger-Snek* is unlike transposons seen in terrestrial elapid snakes

Our *ab initio* repeat annotation revealed a novel *Harbinger* DNA transposon in *L. colubrina*,  
*Harbinger-Snek*. Using BLASTN we found *Harbinger-Snek* present in both *L. colubrina* and *L.*  
*laticaudata*, but failed to identify any similar sequences in terrestrial relatives. *Harbingers* are a  
superfamily of transposons encoding two proteins, a transposase and a Myb-like DNA-binding  
135 protein [46]. While both are necessary for transposition [47], we identified multi-copy variants of  
*Harbinger-Snek* which encoded only one of the two proteins. These variants likely result from large  
deletions, and may be non-autonomous. In addition, we identified many short non-autonomous  
variants which retain the same TSDs and terminal motifs, yet encode no proteins.

### 140 *Harbinger-Snek* was horizontally transferred to *Laticauda*

*Harbingers* have previously been reported in a wide variety of aquatic vertebrates including fish,  
crocodilians and testudines, but not in terrestrial vertebrates [29]. Our repeat annotation of the  
*Laticauda*, *Aipysurus*, *Naja*, *Notechis* and *Pseudonaja* assemblies confirmed *Harbinger-Snek* is  
unique to the two *Laticauda* species examined and is the dominant transposable element in both  
145 species (Table 1). This absence from relatives suggested *Harbinger-Snek* was horizontally  
transferred into the ancestral *Laticauda* genome and our search of over 600 metazoan genome  
assemblies identified similar sequences only in echinoderms, bivalves and teleosts.

The nucleotide sequences most similar to *Harbinger-Snek* were identified in the purple sea urchin, *Strongylocentrotus purpuratus*, and were ~90% identical to the transposase coding region and  
150 ~88% identical to the DNA-binding protein. Based on a) high numbers of *Harbinger-Snek* in both species of *Laticauda* sampled and b) similar sequences only present in marine species, we conclude that *Harbinger-Snek* was likely horizontally transferred to *Laticauda* following their divergence from terrestrial snakes 15-25 Mya, and prior to the crown group divergence of the eight recognised species in *Laticauda* (spanned by *L. colubrina* and *L. laticaudata*) ~15 Mya [16].

155

Our phylogenetic analysis (Figure 1) of similar *Harbinger* transposase sequences placed *Harbinger-Snek* in a strongly supported cluster with *Harbingers* found in two sea urchins, *S. purpuratus* and *Hemicentrotus pulcherrimus* (order Echinoidea). Interestingly, neither Echinoidea assembly contained more than 10 *Harbinger-Snek*-like transposons, none of which encode both  
160 proteins. *H. pulcherrimus* *Harbinger-Snek*-like transposons only contained the transposase, while the *S. purpuratus* assembly contained *Harbinger-Snek*-like transposons encoding either the transposase or the DNA binding protein. In addition, the species that cluster together elsewhere on the tree are not closely related, for example, the sister cluster to the *Laticauda*-Echinoidea cluster contains a variety of fish and bivalve species. The mismatch of the species tree and the  
165 transposase tree suggests horizontal transfer of *Harbinger-Snek*-like transposons may be widespread among these marine organisms.

### ***Harbinger-Snek* expanded rapidly in *Laticauda* and is now much less active**

Both the RepeatMasker annotation and BLASTN searches reveal a massive expansion in both  
170 *Laticauda* species, making up 8% of the *L. laticaudata* assembly and 12% of the larger *L. colubrina* assembly (Table 1, Figure 2). To become established within a host genome following horizontal transfer, TEs must rapidly proliferate, or be lost due to genetic drift or negative selection [48]. To our knowledge the largest previously described expansion of DNA transposons in amniotes following HT is that of *hATs* in the bat *Myotis lucifugus* [13–15]. Following HT ~30 Mya, *hAT*  
175 transposons quickly expanded over 15 My at an estimated rate of ~0.7 Mbp/My and currently make up ~3.3% of the *M. lucifugus* genome. Using the upper bound of *Harbinger-Snek*'s transfer of 25

My (directly after their divergence from terrestrial Australian snakes), we calculate *Harbinger-Snek* to have expanded in *L. colubrina* at a rate of 11.3 Mbp/My and in *L. laticauda* a rate of 8.12 Mbp/My. Therefore, our finding is the largest described expansion of a TE in an amniote following  
180 HTT.

Mass expansion of existing TEs during speciation has previously been seen in many groups including primates [49], woodpeckers [50] and salmonids [51]. By making the genome more dynamic these expansions fostered rapid adaptations. The sharp peak in the divergence profile (Figure 2) indicates *Harbinger-Snek*'s expansion was rapid, and the small number of near-identical  
185 copies suggests expansion has slowed massively, especially in *L. laticaudata*. Many more copies of *Harbinger-Snek* able to transpose are present in the *L. colubrina* assembly than the *L. laticaudata* assembly, with only 1 fully intact copy in *L. laticaudata*, but 269 in *L. colubrina*. Our alignment of *L. laticaudata* RNA-seq data from four tissues (vomeronasal organ, nasal cavity, tongue and liver) to the *L. laticaudata* genome revealed reads mapping across both coding regions  
190 of the intact copy of *Harbinger-Snek*. Therefore, *Harbinger-Snek* and its non-autonomous derivatives may still be transposing in *L. laticaudata*.

In addition to containing many more intact copies of the full element, *Laticauda colubrina* also contains a higher number of the aforementioned "solo-ORF" variants than *L. laticaudata*, with 2263 intact transposase only variants compared to 35, and 452 intact DNA binding protein only variants  
195 compared to 6. Based on this stark contrast, since divergence ~15 Mya [16] either *L. colubrina* has maintained a higher rate of *Harbinger-Snek* expansion or *L. laticaudata* has had a higher rate of *Harbinger-Snek* loss; or more likely, a combination of these two effects.

### **The accordion model - the expansion of *Harbinger-Snek* has been balanced by loss in *L. laticaudata***

The peak in *Harbinger-Snek* expansion in *L. colubrina* is both higher and more recent than *L. laticaudata* (Figure 2). In addition *L. laticaudata* has a much lower overall *Harbinger-Snek* content and genome size (Table 1). Past observations in birds, mammals and squamates found increases in genome size due to transposon expansion are balanced by loss due to deletions through non-  
205 allelic homologous recombination (NAHR) [52,53]. We expect that the mass expansion of

*Harbinger-Snek* in *Laticauda* has generated many near identical sites in the genome, in turn promoting NAHR. In spite of the explosive expansion of *Harbinger-Snek* in *L. laticaudata*, the genome size and total TE content is very similar to that of the terrestrial *Pseudonaja* and *Notechis* (Table 1). This retention of a similar genome size is not seen in *L. colubrina*, the genome assembly of which is 20% larger than the terrestrial species. However, the overall TE content of the *L. colubrina* genome remains similar to that of *L. laticaudata* and the terrestrial species, with the expansion of TEs only contributing half of the total increase in genome size. This is consistent with the aforementioned balancing of TE expansion by deletions.

### 215 **Expansion of *Harbinger-Snek* has potentially impacted gene function**

In both species of *Laticauda* many insertions of *Harbinger-Snek* overlap with or are contained within exons, regulatory regions and introns. Insertions overlapped with the exons of 56 genes in *L. colubrina* and 31 in *L. laticaudata*, 17 of which are shared (SI Table 1). By manually inspecting transcripts mapped to the *L. laticaudata* genome we determined 8 3' UTRs and 2 coding exons predicted by Liftoff now contain *Harbinger-Snek* insertions which contribute to mRNA (SI Table 1). These genes have a wide range of functions, many of which could be significant in the context of adaptation. We also identified insertions into 1685 and 888 potentially regulatory regions (within 5 kbp of the 5' UTR in genes) and into introns of 4141 and 1440 genes in *L. colubrina* and *L. laticaudata* respectively. PANTHER over/under-representation tests of these in gene and regulatory region insertions identified a number of pathways of potential adaptive significance (SI Tables 2-5). Therefore, *Harbinger-Snek* is a prime candidate in the search for genomic changes responsible for *Laticauda's* adaptation to a marine environment through altered gene expression.

### **Conclusion**

230 In this report, we describe the rapid expansions of *Harbinger-Snek* TEs in *Laticauda* spp., to our knowledge, the fastest expansion of a DNA transposon in amniotes reported to date. The large number of insertions of *Harbinger-Snek* into exons and regulatory regions may have contributed to speciation and adaptation to a new habitat; this suggests a number of future lines of investigation. As the HTT was prior to the divergence of 8 *Laticauda* species, *Harbinger-Snek* presents a unique



235 opportunity to reconstruct subsequent molecular evolution and determine the impact of HTT on the  
adaptation of *Laticauda* to the amphibious-marine habitat.

## Figures/Tables

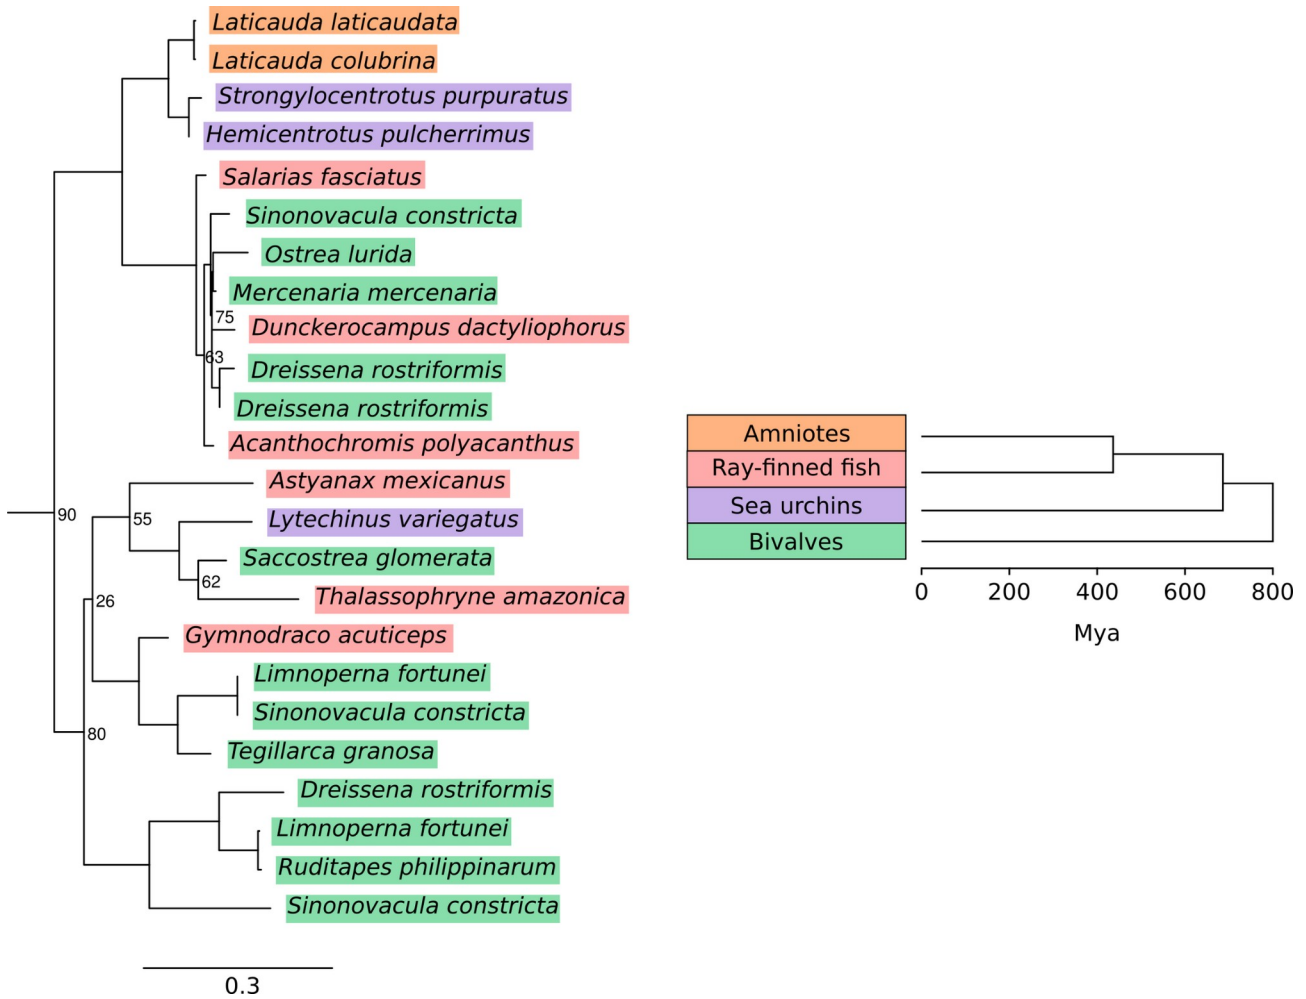

240 Figure 1. The absence of *Harbinger-Snek* from terrestrial vertebrates and its highest  
 similarity to *Harbingers* present in sea urchins support its horizontal transfer to *Laticauda*  
 since transitioning to a marine habitat. Nodes without support values have support of 95% or  
 higher. The distribution of species across this tree suggests *Harbinger-Snek*-like transposons were  
 horizontally transferred into a wide variety of species. This figure is an extract of a maximum  
 245 likelihood phylogeny constructed from the aligned nucleotide sequences of the transposases  
 present in curated elements using IQ-TREE 2 [33], for the full tree see SI Figure 1. We also  
 reconstructed trees with similar topologies using RAxML and MrBayes (see methods). Species  
 phylogeny constructed with TimeTree [38].

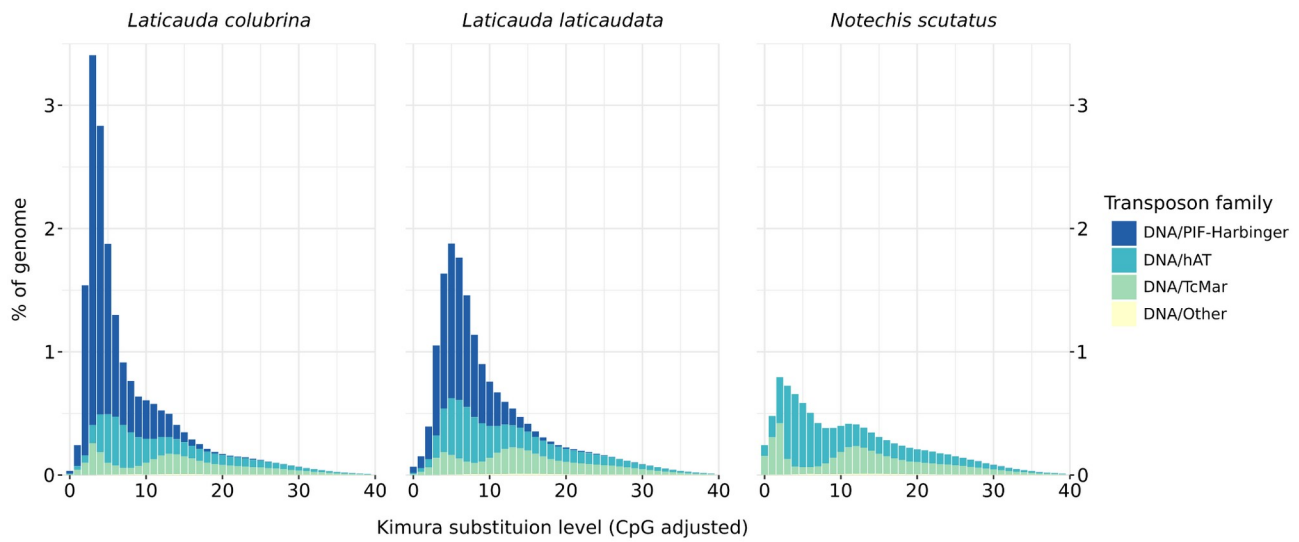

250 **Figure 2. Rapid, recent expansion of *Harbinger-Snek* PIF-Harbinger transposons.** Horizontal transfer of this transposon into the *Laticauda* ancestor has occurred within the past 15-25 My [16]. Due to expansions since then, these transposons have become the dominant DNA transposon in *Laticauda* genomes, in contrast to the genomes of their closest terrestrial relatives such as *Notechis scutatus* (diverged ~15-25 Mya). Repeat content calculated with RepeatMasker [39].

255

|                       | Terrestrial | <i>L. colubrina</i> |                  | <i>L. laticaudata</i> |                 |
|-----------------------|-------------|---------------------|------------------|-----------------------|-----------------|
|                       |             |                     | Diff. Mbp (%)    |                       | Diff. Mbp (%)   |
| Retrotransposons      |             |                     |                  |                       |                 |
| SINEs (Mbp)           | 25.81       | 24.31               | -1.27 (-0.06%)   | 24.57                 | -1.00 (-0.06%)  |
| Penelopes (Mbp)       | 33.19       | 42.34               | +9.20 (0.45%)    | 45.28                 | +12.15 (0.78%)  |
| LINEs (Mbp)           | 277.65      | 262.89              | -9.33 (-0.46%)   | 235.46                | -36.76 (-2.36%) |
| LTR elements (Mbp)    | 175.52      | 202.06              | +27 (1.33%)      | 131.33                | -43.73 (-2.81%) |
| DNA transposons       |             |                     |                  |                       |                 |
| hATs (Mbp)            | 88.63       | 79.33               | -6.92 (-0.34%)   | 77.62                 | -8.63 (-0.55%)  |
| Tc1/Mariners (Mbp)    | 61.56       | 57.80               | -1.11 (-0.05%)   | 55.43                 | -3.48 (-0.22%)  |
| Harbinger (Mbp)       | 0.44        | 229.84              | +229.42 (11.33%) | 126.84                | +126.42 (8.11%) |
| Rolling-circles (Mbp) | 3.24        | 3.09                | -0.13 (-0.01%)   | 3.01                  | -0.20 (-0.01%)  |
| Unclassified (Mbp)    | 165.40      | 140.72              | -20.15 (-1.00%)  | 134.11                | -26.77 (-1.72%) |
| Total TEs (Mbp)       | 798.05      | 999.63              | +217.30 (10.73%) | 788.05                | 5.72 (0.37%)    |
| Assembly size (Mbp)   | 1,665.53    | 2,024.69            | +396.91 (19.60%) | 1,558.71              | -69.01 (-4.43%) |

Table 1: **The expansion of *Harbinger* elements in *Laticauda* spp.** This expansion, along with  
260 that of LTR elements, in *L. colubrina* has contributed to *L. colubrina* having a larger genome than  
terrestrial species. This gain in *L. laticaudata* appears to have been offset to some degree by loss  
from other TE families. Mbp or percentage difference in assembly repeat content between  
*Laticauda* and the average of the terrestrial *Notechis scutatus* and *Pseudonaja textilis*. Repeat  
content was annotated using RepeatMasker [39] using a combined Replibase [29] and curated  
265 RepeatModeler2 [20] library.

### Supplementary Information

SI Table 1 - *Laticauda colubrina* and *Laticauda laticaudata* genes with *Harbinger-Snek* insertions  
into or overlapping open reading frames, and any noticeable effects on insertion noted from  
270 transcript data. Gene coordinates predicted with LiftOff [40] using the RefSeq *Notechis scutatus*  
assembly and gene annotation as reference. Repeat annotation performed with RepeatMasker [39]  
using a custom repeat library (see Methods). Intersect performed using BEDTools [54]. Transcripts

mapped to the genome assembly using STAR [44] and viewed in IGV [45].

275 SI Table 2 - Biological processes with an over/under-representation of *Harbinger-Snek* insertions into *Laticauda colubrina* genes. Representation test performed using PANTHER [43]. Gene coordinates predicted with Liftoff [40] using the RefSeq *Notechis scutatus* assembly and gene annotation as reference. Repeat annotation performed with RepeatMasker [39] using a custom repeat library (see Methods). Intersect performed using plyranges [42].

280

SI Table 3 - Molecular functions with an over/under-representation of *Harbinger-Snek* insertions into *Laticauda colubrina* genes. Representation test performed using PANTHER [43]. Gene coordinates predicted with Liftoff [40] using the RefSeq *Notechis scutatus* assembly and gene annotation as reference. Repeat annotation performed with RepeatMasker [39] using a custom

285 repeat library (see Methods). Intersect performed using plyranges [42].

SI Table 4 - Biological processes with an over/under-representation of *Harbinger-Snek* insertions into potential regulatory regions of *Laticauda colubrina* genes. Representation test performed using PANTHER [43]. Gene coordinates predicted with Liftoff [40] using the RefSeq *Notechis scutatus*

290 assembly and gene annotation as reference. Repeat annotation performed with RepeatMasker [39] using a custom repeat library (see Methods). Intersect performed using plyranges [42].

SI Table 5 - Molecular functions with an over/under-representation of *Harbinger-Snek* insertions into potential regulatory regions of *Laticauda colubrina* genes. Representation test performed using

295 PANTHER [43]. Gene coordinates predicted with Liftoff [40] using the RefSeq *Notechis scutatus* assembly and gene annotation as reference. Repeat annotation performed with RepeatMasker [39] using a custom repeat library (see Methods). Intersect performed using plyranges [42].

SI Table 6 - Latin species names and versions of all public genomes used. All were downloaded

300 from RefSeq [41] when available, else from GenBank [55].

## References

1. Cosby RL, Chang N-C, Feschotte C. 2019 Host-transposon interactions: conflict, cooperation, and cooption. *Genes Dev.* **33**, 1098–1116.
- 305 2. Bourque G. 2009 Transposable elements in gene regulation and in the evolution of vertebrate genomes. *Curr. Opin. Genet. Dev.* **19**, 607–612.
3. Warren IA, Naville M, Chalopin D, Levin P, Berger CS, Galiana D, Voff J-N. 2015 Evolutionary impact of transposable elements on genomic diversity and lineage-specific innovation in vertebrates. *Chromosome Res.* **23**, 505–531.
- 310 4. Dion-Côté A-M, Renaut S, Normandeau E, Bernatchez L. 2014 RNA-seq reveals transcriptomic shock involving transposable elements reactivation in hybrids of young lake whitefish species. *Mol. Biol. Evol.* **31**, 1188–1199.
5. El Baidouri M *et al.* 2014 Widespread and frequent horizontal transfers of transposable elements in plants. *Genome Res.* **24**, 831–838.
- 315 6. Ivancevic AM, Kortschak RD, Bertozzi T, Adelson DL. 2018 Horizontal transfer of BovB and L1 retrotransposons in eukaryotes. *Genome Biol.* **19**, 85.
7. Peccoud J, Loiseau V, Cordaux R, Gilbert C. 2017 Massive horizontal transfer of transposable elements in insects. *Proc. Natl. Acad. Sci. U. S. A.* **114**, 4721–4726.
8. Reiss D, Mialdea G, Miele V, de Vienne DM, Peccoud J, Gilbert C, Duret L, Charlat S. 2019 Global survey of mobile DNA horizontal transfer in arthropods reveals Lepidoptera as a prime hotspot. *PLoS Genet.* **15**, e1007965.
- 320 9. Zhang H-H, Peccoud J, Xu M-R-X, Zhang X-G, Gilbert C. 2020 Horizontal transfer and evolution of transposable elements in vertebrates. *Nat. Commun.* **11**, 1362.
10. Gilbert C, Feschotte C. 2018 Horizontal acquisition of transposable elements and viral sequences: patterns and consequences. *Curr. Opin. Genet. Dev.* **49**, 15–24.
- 325 11. Foley NM, Springer MS, Teeling EC. 2016 Mammal madness: is the mammal tree of life not yet resolved? *Philos. Trans. R. Soc. Lond. B Biol. Sci.* **371**. (doi:10.1098/rstb.2015.0140)
12. Chen L *et al.* 2019 Large-scale ruminant genome sequencing provides insights into their evolution and distinct traits. *Science* **364**. (doi:10.1126/science.aav6202)
- 330 13. Ray DA, Feschotte C, Pagan HJT, Smith JD, Pritham EJ, Arensburger P, Atkinson PW, Craig NL. 2008 Multiple waves of recent DNA transposon activity in the bat, *Myotis lucifugus*. *Genome Res.* **18**, 717–728.
14. Pace JK 2nd, Gilbert C, Clark MS, Feschotte C. 2008 Repeated horizontal transfer of a DNA transposon in mammals and other tetrapods. *Proc. Natl. Acad. Sci. U. S. A.* **105**, 17023–17028.
- 335 15. Novick P, Smith J, Ray D, Boissinot S. 2010 Independent and parallel lateral transfer of DNA transposons in tetrapod genomes. *Gene* **449**, 85–94.
16. Sanders KL, Lee MSY, Leys R, Foster R, Keogh JS. 2008 Molecular phylogeny and divergence dates for Australasian elapids and sea snakes (hydrophiinae): evidence from seven genes for rapid evolutionary radiations. *J. Evol. Biol.* **21**, 682–695.
- 340 17. Sanders KL, Mumpuni, Lee MSY. 2010 Uncoupling ecological innovation and speciation in sea snakes (Elapidae, Hydrophiinae, Hydrophiini). *J. Evol. Biol.* **23**, 2685–2693.

18. Lee MSY, Sanders KL, King B, Palci A. 2016 Diversification rates and phenotypic evolution in venomous snakes (Elapidae). *R Soc Open Sci* **3**, 150277.
- 345 19. Mirtschin P, Rasmussen A, Weinstein S. 2017 Australia's Dangerous Snakes. (doi:10.1071/9780643106741)
20. Flynn JM, Hubley R, Goubert C, Rosen J, Clark AG, Feschotte C, Smit AF. 2020 RepeatModeler2 for automated genomic discovery of transposable element families. *Proc. Natl. Acad. Sci. U. S. A.* **117**, 9451–9457.
- 350 21. Kishida T, Go Y, Tatsumoto S, Tatsumi K, Kuraku S, Toda M. 2019 Loss of olfaction in sea snakes provides new perspectives on the aquatic adaptation of amniotes. *Proc. Biol. Sci.* **286**, 20191828.
22. Ludington AJ, Sanders KL. 2021 Demographic analyses of marine and terrestrial snakes (Elapidae) using whole genome sequences. *Mol. Ecol.* **30**, 545–554.
- 355 23. Galbraith JD, Ludington AJ, Suh A. 2020 New Environment, New Invaders—Repeated Horizontal Transfer of LINES to Sea Snakes. *Genome Biol. Evol.*
24. Zhang Z, Schwartz S, Wagner L, Miller W. 2000 A greedy algorithm for aligning DNA sequences. *J. Comput. Biol.* **7**, 203–214.
25. Suryamohan K *et al.* 2020 The Indian cobra reference genome and transcriptome enables comprehensive identification of venom toxins. *Nat. Genet.* **52**, 106–117.
- 360 26. Vonk FJ *et al.* 2013 The king cobra genome reveals dynamic gene evolution and adaptation in the snake venom system. *Proc. Natl. Acad. Sci. U. S. A.* **110**, 20651–20656.
27. Altschul SF, Madden TL, Schäffer AA, Zhang J, Zhang Z, Miller W, Lipman DJ. 1997 Gapped BLAST and PSI-BLAST: a new generation of protein database search programs. *Nucleic Acids Res.* **25**, 3389–3402.
- 365 28. Mistry J *et al.* 2021 Pfam: The protein families database in 2021. *Nucleic Acids Res.* **49**, D412–D419.
29. Bao W, Kojima KK, Kohany O. 2015 Repbase Update, a database of repetitive elements in eukaryotic genomes. *Mob. DNA* **6**, 11.
- 370 30. Katoh K, Standley DM. 2013 MAFFT multiple sequence alignment software version 7: improvements in performance and usability. *Mol. Biol. Evol.* **30**, 772–780.
31. Castresana J. 2000 Selection of conserved blocks from multiple alignments for their use in phylogenetic analysis. *Mol. Biol. Evol.* **17**, 540–552.
32. Price MN, Dehal PS, Arkin AP. 2010 FastTree 2--approximately maximum-likelihood trees for large alignments. *PLoS One* **5**, e9490.
- 375 33. Minh BQ, Schmidt HA, Chernomor O, Schrempf D, Woodhams MD, von Haeseler A, Lanfear R. 2020 IQ-TREE 2: New Models and Efficient Methods for Phylogenetic Inference in the Genomic Era. *Mol. Biol. Evol.* **37**, 1530–1534.
34. Kalyaanamoorthy S, Minh BQ, Wong TKF, von Haeseler A, Jermini LS. 2017 ModelFinder: fast model selection for accurate phylogenetic estimates. *Nat. Methods* **14**, 587–589.
- 380 35. Hoang DT, Chernomor O, von Haeseler A, Minh BQ, Vinh LS. 2018 UFBoot2: Improving the Ultrafast Bootstrap Approximation. *Mol. Biol. Evol.* **35**, 518–522.
36. Huelsenbeck JP, Ronquist F. 2001 MRBAYES: Bayesian inference of phylogenetic trees.

*Bioinformatics* **17**, 754–755.

- 375 37. Stamatakis A. 2014 RAxML version 8: a tool for phylogenetic analysis and post-analysis of  
385 large phylogenies. *Bioinformatics* **30**, 1312–1313.
38. Kumar S, Stecher G, Suleski M, Hedges SB. 2017 TimeTree: A Resource for Timelines,  
Timetrees, and Divergence Times. *Mol. Biol. Evol.* **34**, 1812–1819.
39. SMIT, A. 2004 Repeat-Masker Open-3.0. <http://www.repeatmasker.org>
40. Shumate A, Salzberg SL. 2020 Liftoff: accurate mapping of gene annotations. *Bioinformatics*  
390 (doi:10.1093/bioinformatics/btaa1016)
41. O’Leary NA *et al.* 2016 Reference sequence (RefSeq) database at NCBI: current status,  
taxonomic expansion, and functional annotation. *Nucleic Acids Res.* **44**, D733–45.
42. Lee S, Cook D, Lawrence M. 2019 plyranges: a grammar of genomic data transformation.  
*Genome Biol.* **20**, 4.
- 395 43. Mi H, Ebert D, Muruganujan A, Mills C, Albu L-P, Mushayamaha T, Thomas PD. 2021  
PANTHER version 16: a revised family classification, tree-based classification tool, enhancer  
regions and extensive API. *Nucleic Acids Res.* **49**, D394–D403.
44. Dobin A, Davis CA, Schlesinger F, Drenkow J, Zaleski C, Jha S, Batut P, Chaisson M,  
Gingeras TR. 2013 STAR: ultrafast universal RNA-seq aligner. *Bioinformatics* **29**, 15–21.
- 400 45. Robinson JT, Thorvaldsdóttir H, Winckler W, Guttman M, Lander ES, Getz G, Mesirov JP.  
2011 Integrative genomics viewer. *Nat. Biotechnol.* **29**, 24–26.
46. Kapitonov VV, Jurka J. 2004 Harbinger transposons and an ancient HARBI1 gene derived  
from a transposase. *DNA Cell Biol.* **23**, 311–324.
- 405 47. Sinzelle L, Kapitonov VV, Grzela DP, Jursch T, Jurka J, Izsvák Z, Ivics Z. 2008 Transposition  
of a reconstructed Harbinger element in human cells and functional homology with two  
transposon-derived cellular genes. *Proc. Natl. Acad. Sci. U. S. A.* **105**, 4715–4720.
48. Le Rouzic A, Capy P. 2005 The first steps of transposable elements invasion: parasitic  
strategy vs. genetic drift. *Genetics* **169**, 1033–1043.
- 410 49. Pace JK 2nd, Feschotte C. 2007 The evolutionary history of human DNA transposons:  
evidence for intense activity in the primate lineage. *Genome Res.* **17**, 422–432.
50. Manthey JD, Moyle RG, Boissinot S. 2018 Multiple and Independent Phases of Transposable  
Element Amplification in the Genomes of Piciformes (Woodpeckers and Allies). *Genome Biol.  
Evol.* **10**, 1445–1456.
- 415 51. de Boer JG, Yazawa R, Davidson WS, Koop BF. 2007 Bursts and horizontal evolution of DNA  
transposons in the speciation of pseudotetraploid salmonids. *BMC Genomics* **8**, 422.
52. Kapusta A, Suh A, Feschotte C. 2017 Dynamics of genome size evolution in birds and  
mammals. *Proc. Natl. Acad. Sci. U. S. A.* **114**, E1460–E1469.
53. Pasquesi GIM *et al.* 2018 Squamate reptiles challenge paradigms of genomic repeat element  
evolution set by birds and mammals. *Nat. Commun.* **9**, 2774.
- 420 54. Quinlan AR, Hall IM. 2010 BEDTools: a flexible suite of utilities for comparing genomic  
features. *Bioinformatics* **26**, 841–842.
55. Benson DA, Clark K, Karsch-Mizrachi I, Lipman DJ, Ostell J, Sayers EW. 2015 GenBank.  
*Nucleic Acids Res.* **43**, D30–5.





*Laticauda colubrina*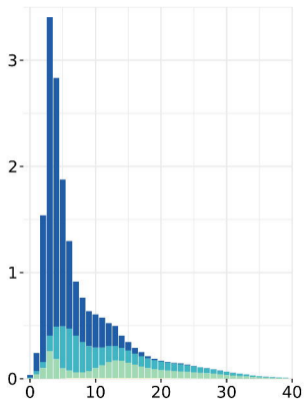*Laticauda laticaudata*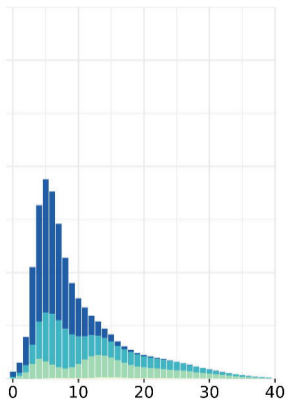*Notechis scutatus*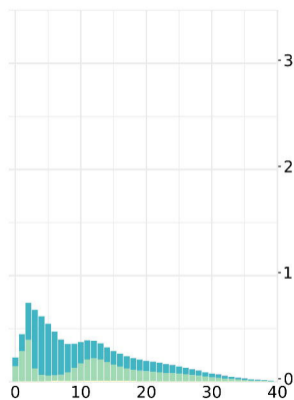

Transposon family

- DNA/PIF-Harbinger
- DNA/hAT
- DNA/TcMar
- DNA/Other

Kimura substitution level (CpG adjusted)

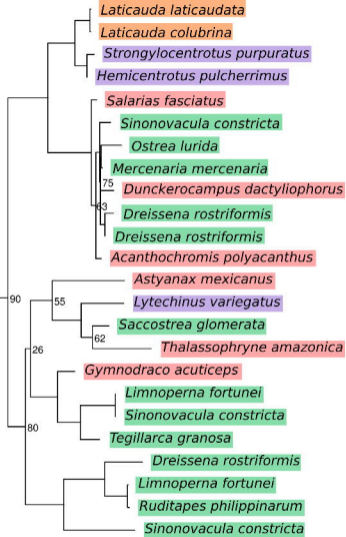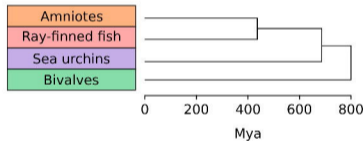

Source: http://biorxiv.org/content/10.1101/2021.06.13.448261v1.full.pdf
